# Supplementary material for: Formoterol Exerts Anti-Cancer Effects Modulating Oxidative Stress and Epithelial-Mesenchymal Transition Processes in Cigarette Smoke Extract Exposed Lung Adenocarcinoma Cells
Source: MDPI journal article supplement (doi:10.3390/ijms242216088), 2023-11-08
Supplement: s1 [file s1]

# Supplementary Materials

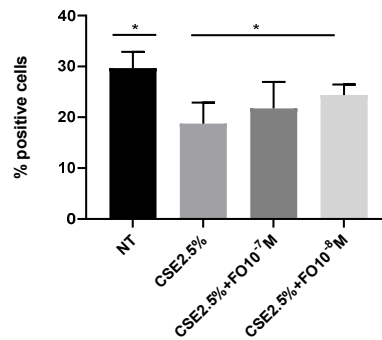

**Figure S1.** E-cadherin protein expression in A549 cells, dose response experiment. A549 cells were exposed to CSE 2.5% with or without FO 10<sup>-7</sup> M or FO 10<sup>-8</sup> M for 48 h, FO were added 30 min before CSE cell stimulation. E-cadherin protein expression was evaluated by flow cytometry. E-cadherin protein expression in A549 cells was showed as % positive cells and expressed as mean  $\pm$  SD ( $N = 3$ ). Representative histograms relative E-cadherin protein expression (B–D) were shown. \* $p < 0.05$  ANOVA with Bonferroni correction.

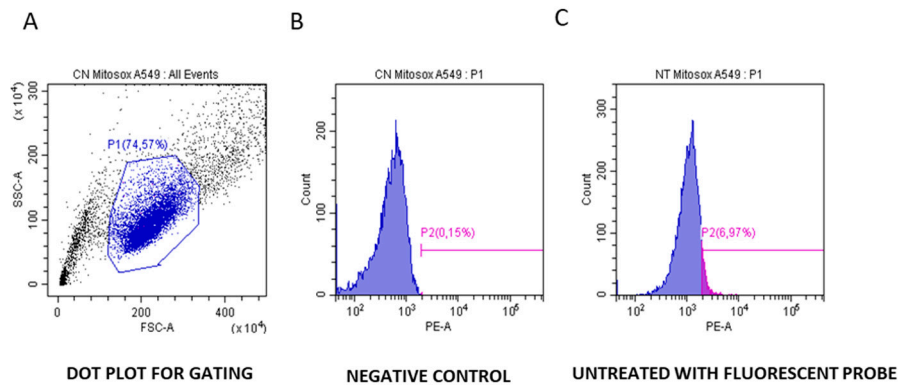

**Figure S2.** Gating strategy. (A) Representative dot plot relatively morphologic parameters FSC (forward scatter) and SSC (side scatter), with gate region P1; (B) Representative histogram of negative control; (C) Representative histogram with fluorescent probe.

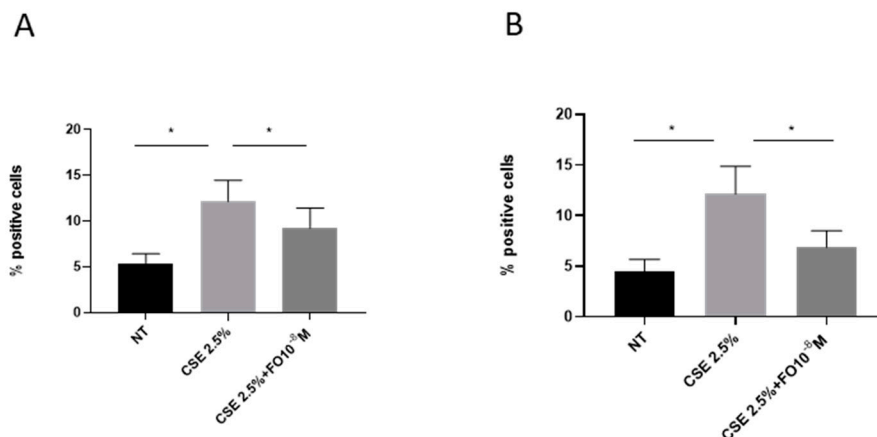

**Figure S3.** ROS and mitochondrial superoxide production in COLO699 N cells. COLO699 N cells were exposed to CSE 2.5% with or without FO 10<sup>-8</sup> M for 24h, FO was added 30 min before CSE cell stimulation. ROS, and mitochondrial superoxide were assessed by flow cytometry. ROS (A) and mitochondrial superoxide (B) levels in COLO699 N cells were showed as % positive cells and expressed as mean  $\pm$  SD ( $N = 5$ ). \* $p < 0.05$  ANOVA with Bonferroni correction.

## **Supplementary Materials and Methods**

### *Cell Culture COLO699 N*

COLO699 N (adenocarcinoma cells derived from pleural fluid), cell line was purchased from Interlab Cell Line Collection (Genoa, Italy). The cells were cultured in a humidified ambient and air with 5% CO<sub>2</sub> at 37 °C. COLO699 N were maintained in RPMI-1640 medium supplemented with heat deactivated (56 °C, 30 min) 10% FBS, 1% streptomycin and penicillin, 1% non-essential amino acids and 2 mM L-glutamine. Cells were grown to confluence and were stimulated with or without CSE 2.5% and Formoterol 10<sup>-8</sup> M (F9552- Sigma-Aldrich, St. Louis, Missouri, USA). Formoterol (FO) was added 30 min before CSE cells stimulation. During the treatment, serum concentration in the medium was limited to 1%. The experiments were repeated at least three independent times and each experiment was performed at least in duplicate.
